# Supplementary material for: Bibliometric analysis of extracellular vesicles in osteoarthritis
Source: Research Square preprint supplement (doi:10.21203/rs.3.rs-5627430/v1), 2024-12-30
Supplement: Supplementary file 1 [file 2e69aca7dbac138ca5386d76.pdf]

a

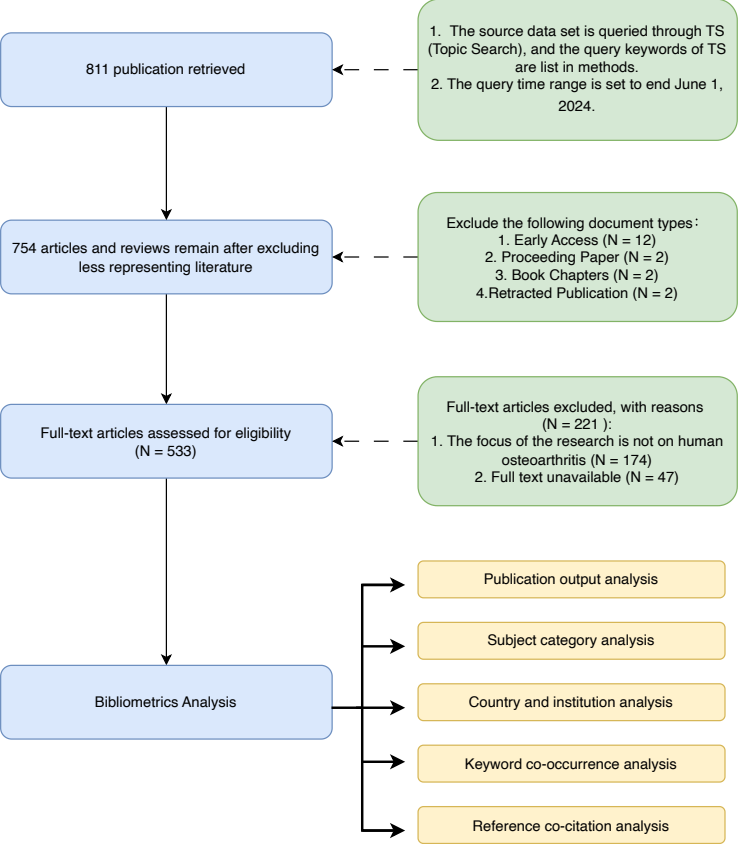

b

| Metadata | Description          | Missing Counts | Missing % | Status     |
|----------|----------------------|----------------|-----------|------------|
| C1       | Affiliation          | 0              | 0.00      | Excellent  |
| AU       | Author               | 0              | 0.00      | Excellent  |
| CR       | Cited References     | 0              | 0.00      | Excellent  |
| RP       | Corresponding Author | 0              | 0.00      | Excellent  |
| DT       | Document Type        | 0              | 0.00      | Excellent  |
| SO       | Journal              | 0              | 0.00      | Excellent  |
| LA       | Language             | 0              | 0.00      | Excellent  |
| PY       | Publication Year     | 0              | 0.00      | Excellent  |
| WC       | Science Categories   | 0              | 0.00      | Excellent  |
| TI       | Title                | 0              | 0.00      | Excellent  |
| TC       | Total Citation       | 0              | 0.00      | Excellent  |
| AB       | Abstract             | 2              | 0.38      | Good       |
| DI       | DOI                  | 6              | 1.13      | Good       |
| ID       | Keywords Plus        | 16             | 3.00      | Good       |
| DE       | Keywords             | 54             | 10.13     | Acceptable |
